# Supplementary material for: Investigation of the transability of dietary small non-coding RNAs to animals
Source: Front Genet. 2022 Aug 30;13:933709. doi: 10.3389/fgene.2022.933709 (PMC9483711; doi:10.3389/fgene.2022.933709)
Supplement: Supplementary file 9 [file Table10.XLSX]

## Sheet: Between different species
Supplementary File S10: Common xenomiRs among the different species and tissues.
Species names	Number of common miRNAs	Name of Common miRNAs
Bos taurus, Capra hircus, Ovis aries, Rattus norvegicus,	1	miR-166b
Bos taurus, Capra hircus, Ovis aries, Sus scrofa,	1	miR-166l
Bos taurus, Mus musculus, Ovis aries, Rattus norvegicus,	1	miR-164f
Bos taurus, Mus musculus, Ovis aries, Sus scrofa,	1	miR-156k
Bos taurus, Ovis aries, Rattus norvegicus, Sus scrofa,	2	miR-168b, miR-168a
Bos taurus, Capra hircus, Homo sapiens,	1	miR-1524
Bos taurus, Capra hircus, Ovis aries,	3	miR-5031, miR-156e, miR-172e
Bos taurus, Capra hircus, Rattus norvegicus,	1	miR-159b
Bos taurus, Capra hircus, Sus scrofa,	2	miR-393a, miR-395a
Bos taurus, Ovis aries, Sus scrofa,	3	miR-156d, miR-396c, miR-172c
Capra hircus, Mus musculus, Ovis aries,	2	miR-164a, miR-6300
Capra hircus, Ovis aries, Rattus norvegicus,	5	miR-167i, miR-167e, miR-5144, miR-5075, miR-156g
Capra hircus, Ovis aries, Sus scrofa,	1	miR-2118a
Capra hircus, Rattus norvegicus, Sus scrofa,	2	miR-169r
Homo sapiens, Rattus norvegicus, Sus scrofa,	1	miR-166a
Ovis aries, Rattus norvegicus, Sus scrofa,	3	miR-166f, miR-166h, miR-166g
Bos taurus, Capra hircus,	20	miR-4352b, miR-319i, miR-7509, miR-9743, miR-1534, miR-156r, miR-6203, miR-156c, miR-160b, miR-169j, miR-5764b, miR-1533, miR-395f, miR-10407c, miR-169v, miR-7501, miR-5770b, miR-2111b, miR-5780b, miR-10448
Bos taurus, Mus musculus,	2	miR-1507a, miR-1507b
Bos taurus, Ovis aries,	10	miR-1525, miR-5368, miR-156f, miR-166m, miR-9724b, miR-391, miR-5042, miR-172f, miR-156b, miR-159f
Bos taurus, Rattus norvegicus,	4	miR-171c, miR-395m, miR-164, miR-169g
Bos taurus, Sus scrofa,	4	miR-397b, miR-172d, miR-169f, miR-399h
Capra hircus, Ovis aries,	15	miR-172a, miR-171a, miR-2656d, miR-4403, miR-1509a, miR-5082, miR-156a, miR-156j, miR-172l, miR-167h, miR-172i, miR-2656a, miR-169b, miR-2656c, miR-2656e
Capra hircus, Rattus norvegicus,	3	miR-812i, miR-5179, miR-5077
Capra hircus, Sus scrofa,	6	miR-169n, miR-164c, miR-399i, miR-160f, miR-399e, miR-166i
Mus musculus, Sus scrofa,	2	miR-156h, miR-408b
Ovis aries, Rattus norvegicus,	5	miR-396h, miR-2918, miR-408, miR-396g, miR-1851
Ovis aries, Sus scrofa,	4	miR-390b, miR-395o, miR-166c, miR-397a
Rattus norvegicus, Sus scrofa,	3	miR-319a, miR-156i, miR-2275d

## Sheet: Between different tissues 
Supplementary File S10: Common xenomiRs among the different species and tissues.
Tissues names	Number of common miRNAs	Name of Common miRNAs
duodenum-epithelium, jejunum-epithelium, liver, mammary_gland, plasma_microvesicles, rumen-epithelium	4	miR-4367, miR-395m, miR-319m, miR-399o
duodenum-epithelium, jejunum-epithelium, liver, mammary_gland, plasma_microvesicles	1	miR-191
duodenum-epithelium, jejunum-epithelium, liver, mammary_gland, rumen-epithelium	1	miR-319k
jejunum-epithelium, liver, mammary_gland, plasma_microvesicles, rumen-epithelium	1	miR-4998
duodenum-epithelium, jejunum-epithelium, mammary_gland, plasma_microvesicles	1	miR-159b
duodenum-epithelium, jejunum-epithelium, plasma_microvesicles, rumen-epithelium	1	miR-5764
jejunum-epithelium, mammary_gland, plasma_microvesicles, rumen-epithelium	1	miR-1524
jejunum-epithelium, liver, plasma_microvesicles	1	miR-140
liver, mammary_gland, ovary	2	miR-164a, miR-6300
liver, ovary, plasma_microvesicles	2	miR-156k, miR-164f
mammary_gland, ovary, plasma_microvesicles	11	miR-167i, miR-167e, miR-5031, miR-166b, miR-5144, miR-2118a, miR-166l, miR-5075, miR-156e, miR-156g, miR-172e
mammary_gland, plasma_microvesicles, rumen-epithelium	2	miR-4349, miR-5764b
ovary, plasma_microvesicles, rumen-epithelium	1	miR-156b
duodenum-epithelium, plasma_microvesicles	1	miR-164
liver, plasma_microvesicles	4	miR-1507a, miR-156h, miR-408b, miR-1507b
mammary_gland, ovary	15	miR-172a, miR-171a, miR-2656d, miR-4403, miR-1509a, miR-5082, miR-156a, miR-156j, miR-172l, miR-167h, miR-172i, miR-2656a, miR-169b, miR-2656c, miR-2656e
mammary_gland, plasma_microvesicles	36	miR-4352b, miR-319i, miR-482b-Known, miR-812i, miR-9743, miR-4362, miR-1534, miR-169n, miR-156r, miR-156f-Known, miR-393a, miR-156c, miR-167e-Known, miR-5179, miR-164c, miR-399i, miR-156q-Known, miR-169j, miR-160f, miR-5077, miR-1533, miR-162b-Known, miR-399e, miR-156p-Known, miR-395f, miR-396e-Known, miR-169v, miR-156c-Probable, miR-396f-Known, miR-166i, miR-5770b, miR-2111b, miR-5780b, miR-395a…
mammary_gland, rumen-epithelium	5	miR-7509, miR-6203, miR-160b, miR-10407c, miR-7501
ovary, plasma_microvesicles	25	miR-156d, miR-1525, miR-5368, miR-168b, miR-396h, miR-2918, miR-156f, miR-166f, miR-166m, miR-9724b, miR-391, miR-390b, miR-408, miR-396g, miR-166h, miR-168a, miR-166g, miR-172f, miR-396c, miR-395o, miR-1851, miR-166c, miR-172c, miR-397a, miR-159f
ovary, rumen-epithelium	1	miR-5042
plasma_microvesicles, rumen-epithelium	6	miR-1536, miR-10406b, miR-2111d, miR-2111a, miR-9753, miR-399h
jejunum-epithelium	2	miR-395k, miR-337
liver	4	miR-156o, miR-395b, miR-156n, miR-4369
